# Supplementary material for: High-intensity ultrasonication modification of vapor grown carbon fibers with poly(vinyl alcohol) for the preparation of high strength composites by simple water casting
Source: Royal Society of Chemistry journal article supplement (doi:10.1039/c3ra00116d), 2013-01-01
Supplement: c3ra00116d.pdf [file c3ra00116d.pdf]

## Supporting Information

# High-intensity ultrasonication modification of vapor grown carbon fibers with poly(vinyl alcohol) for the preparation of high strength composites by simple water casting

Lina Sun, Honglei Guo, Zhongming Zhu, Tanghua Guo, and Mao Peng\*

MOE Key Laboratory of Macromolecular Synthesis and Functionalization, Department of Polymer Science and Engineering, Zhejiang University, Hangzhou 310027, China

Email: pengmao@zju.edu.cn

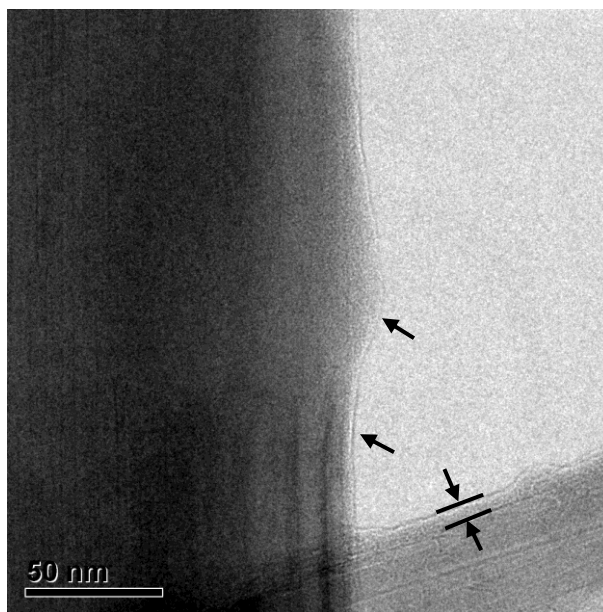

**Figure S1.** Typical HR-TEM image of f-VGCFs-2 showing that a thin layer polymer is attached to the surface of VGCFs.

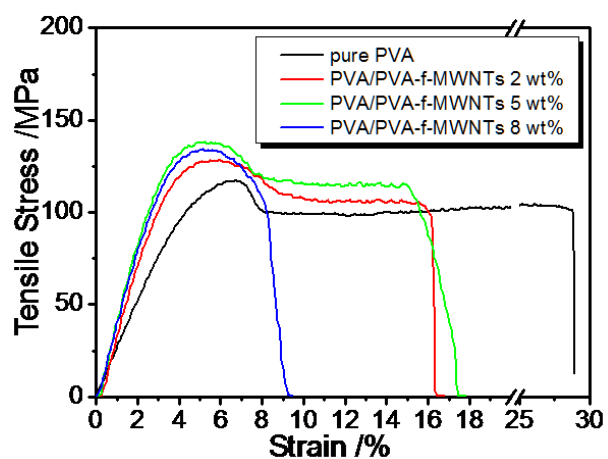

**Figure S2.** Typical stress-strain curves of PVA/f-MWNT nanocomposite films showing moderately enhanced mechanical properties strength.

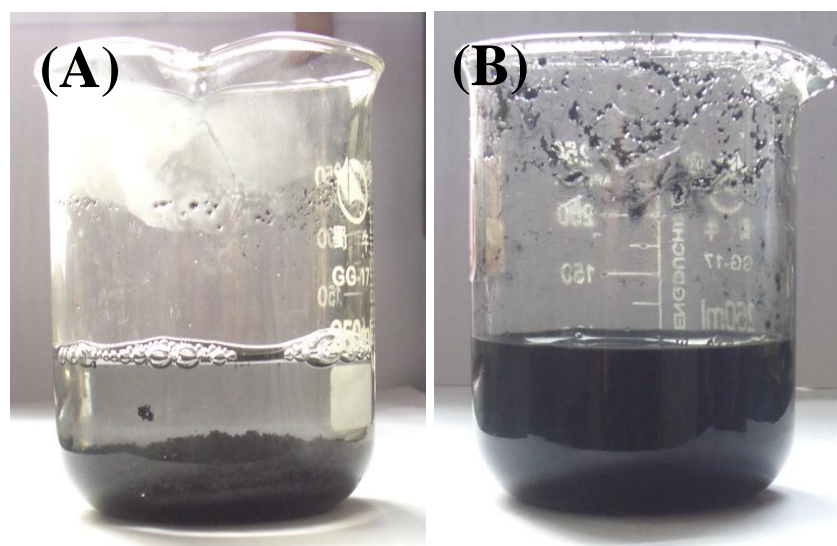

**Figure S3.** Photographs of (A) the mixture of PVA and c-VGCFs, and (B) the mixture of PVA and f-VGCFs-1 in water, after being stocked for about two weeks. It was found that c-VGCFs precipitated from the mixture, while f-VGCFs-1 suspended stably in water.

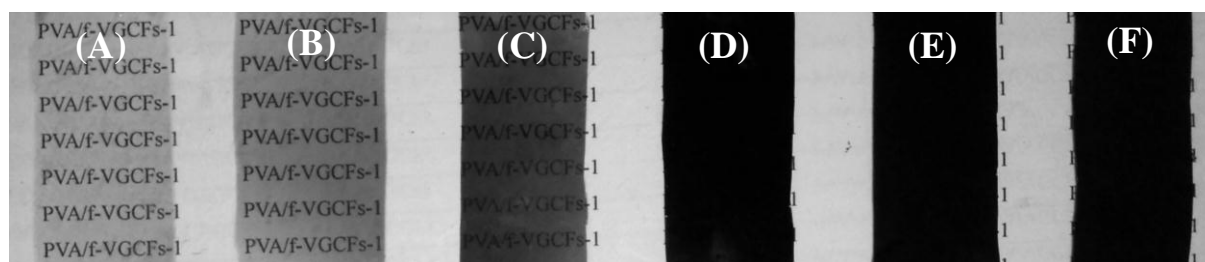

**Figure S4.** Photographs of PVA/f-VGCFs-1 composite films with the f-VGCFs-1 content of (A) 0.5 wt%, (B) 1 wt%, (C) 2wt%, (D) 5 wt%, (E) 8 wt% and (F) 10 wt%. The composite films are uniform and no obvious agglomerates of f-VGCFs-1 are observed in the films even at low filler contents. The thickness of the films are about 40  $\mu\text{m}$ .
